# Supplementary figures and images for: Phototransistors based on a donor–acceptor conjugated polymer with a high response speed
Source: Royal Society of Chemistry journal article supplement (doi:10.1039/c5tc01799h), 2015-01-01

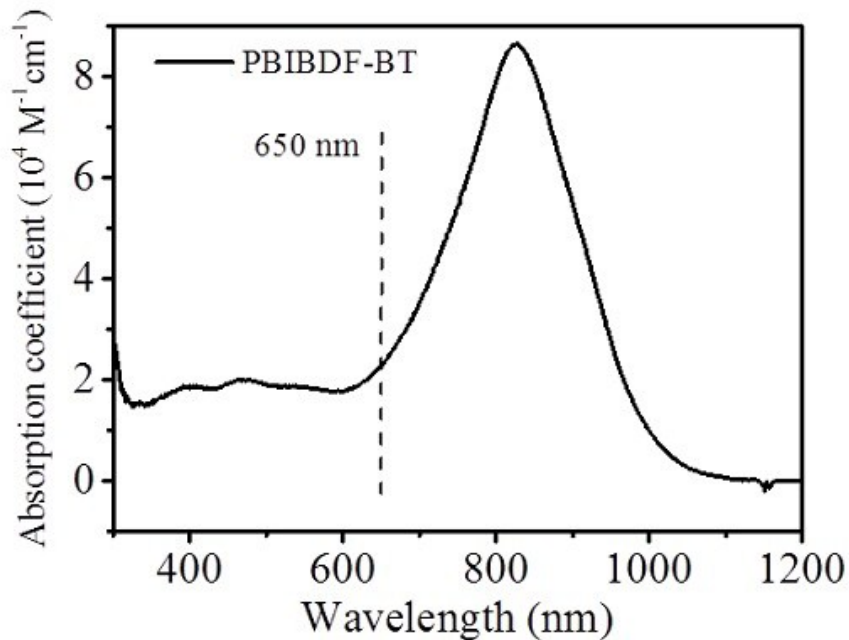

Supplement: c5tc01799h2.pdf [file c5tc01799h2.pdf]

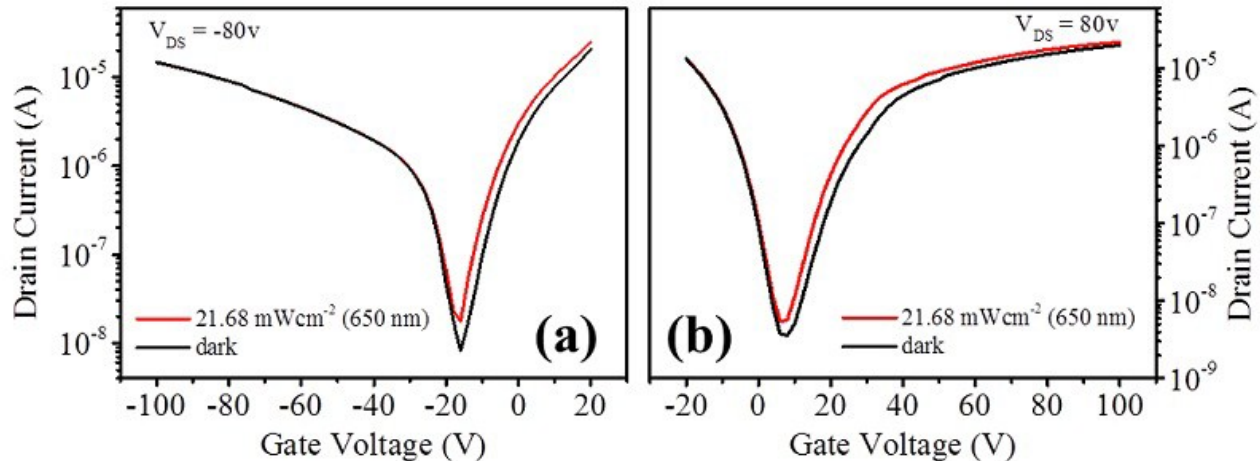

Supplement: c5tc01799h3.pdf [file c5tc01799h3.pdf]

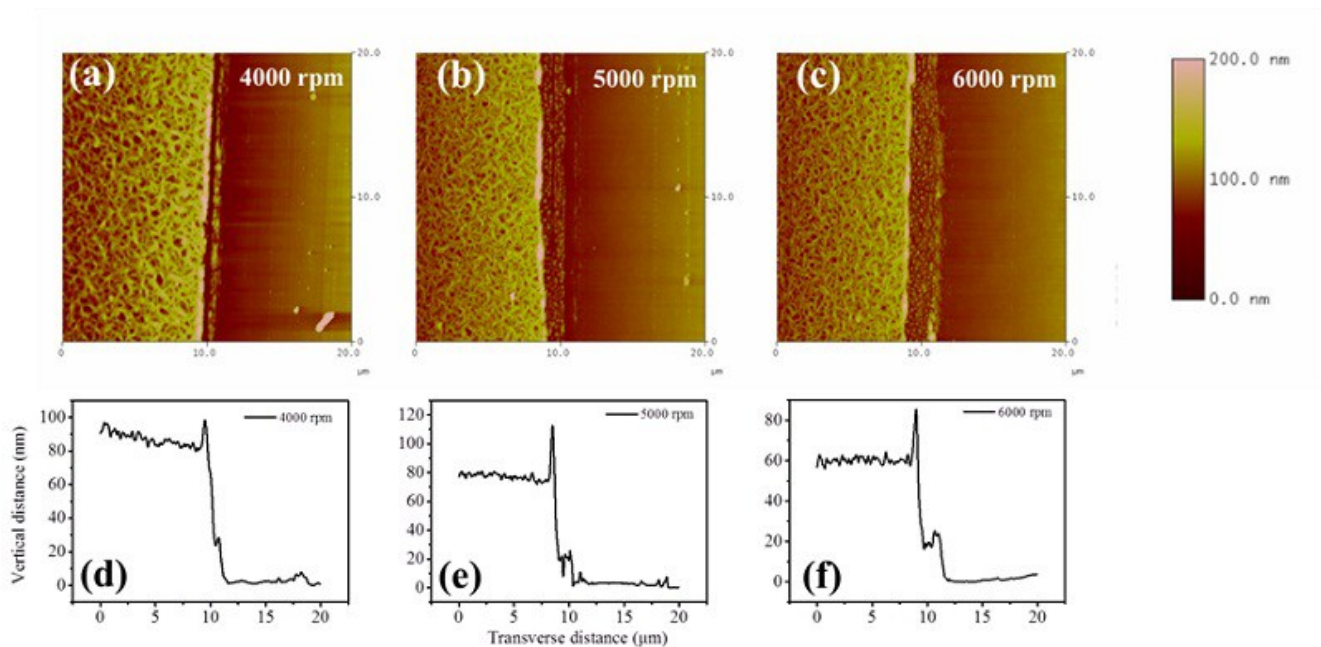

Supplement: c5tc01799h4.pdf [file c5tc01799h4.pdf]
